# Supplementary material for: Persistence of Multiple Paramyxoviruses in a Closed Captive Colony of Fruit Bats (Eidolon helvum)
Source: MDPI journal article supplement (doi:10.3390/v13081659), 2021-08-20
Supplement: s1 [file s1]

# SUPPLEMENTARY MATERIAL

**Table S1. Top BLAST results from submission of the consensus sequence of the L gene.** Abbreviations: P = 530 bp fragment obtained with the pan-*Paramyxovirus* RT-PCR, R = 439 bp fragment obtained with the *Respiro-Morbilli-Henipavirus* RT-PCR.

| Scheme .         | Number of detections | GenBank BLAST ID                                                                                   | GenBank Accession | Nucleotide identity (%) |
|------------------|----------------------|----------------------------------------------------------------------------------------------------|-------------------|-------------------------|
| <b>Z15-U17P</b>  | 1                    | Bat Paramyxovirus Eid_hel/ZFB09-07/Zambia/2009 L gene for RNA polymerase, partial cds              | AB853094.1        | 99.25                   |
| <b>Z15-U27P</b>  | 15                   | Eidolon helvum paramyxovirus clone U68G large protein (L) gene, partial cds                        | JN648082.1        | 96.98                   |
|                  |                      | Eidolon helvum paramyxovirus clone U64A large protein (L) gene, partial cds                        | JN648077.1        | 96.79                   |
| <b>Z15-U111P</b> | 1                    | Eidolon helvum paramyxovirus clone U69D large protein (L) gene, partial cds                        | JN648084.1        | 98.87                   |
|                  |                      | Eidolon helvum paramyxovirus clone U69C large protein (L) gene, partial cds                        | JN648083.1        | 98.68                   |
| <b>Z15-U12R</b>  | 31                   | Paramyxovirus bat/GH27a/2009 polymerase (L) gene, partial cds                                      | FJ971940.1        | 98.63                   |
|                  |                      | Eidolon helvum paramyxovirus clone U61A polymerase (L) gene, partial cds                           | JN862578.1        | 98.38                   |
| <b>Z15-U17R</b>  | 3                    | Bat Paramyxovirus Eid_hel/GB1678/GAB/2005 isolate                                                  |                   |                         |
|                  |                      | BatPV/Eid_hel/GB1678/GAB/2005 RNA-dependent RNA polymerase (L) gene, partial cds                   | HQ660144.1        | 99.54                   |
|                  |                      | Bat Paramyxovirus Eid_hel/GB1535/GAB/2005 isolate                                                  |                   |                         |
|                  |                      | BatPV/Eid_hel/GB1535/GAB/2005 RNA-dependent RNA polymerase (L) gene, partial cds                   | HQ660141.1        | 99.08                   |
| <b>Z15_U27R</b>  | 11                   | Eidolon helvum paramyxovirus clone U51B polymerase (L) gene, partial cds                           | JN862573.1        | 99.54                   |
|                  |                      | Eidolon helvum paramyxovirus clone U51A polymerase (L) gene, partial cds                           | JN862564.1        | 99.09                   |
|                  |                      | Eidolon helvum paramyxovirus clone U50B polymerase (L) gene, partial cds                           | JN862580.1        | 98.18                   |
|                  |                      | Eidolon helvum paramyxovirus clone U63A polymerase (L) gene, partial cds                           | JN862574.1        | 98.18                   |
|                  |                      | Eidolon helvum paramyxovirus clone U64A polymerase (L) gene, partial cds                           | JN862575.1        | 97.72                   |
|                  |                      | Eidolon helvum paramyxovirus clone U49B polymerase (L) gene, partial cds                           | JN862572.1        | 97.72                   |
| <b>Z15-U78R</b>  | 13                   | Bat paramyxovirus Eid.hel/GH45/2008 polymerase (L) gene, partial cds                               | GQ168929.1        | 99.09                   |
|                  |                      | Bat Paramyxovirus Eid_hel/GH-M61a/GHA/2009 isolate                                                 |                   |                         |
|                  |                      | BatPV/Eid_hel/GH-M61a/GHA/2009 RNA-dependent RNA polymerase (L) gene, partial cds                  | HQ660133.1        | 95.67                   |
|                  |                      | Eidolon paramyxovirus RC09 partial L gene for RNA-dependent RNA polymerase, isolate EPMV_RC09_214s | HE647822.1        | 94.99                   |
| <b>Z15-U86R</b>  | 10                   | Eidolon helvum paramyxovirus clone U54B polymerase (L) gene, partial cds                           | JN862571.1        | 97.72                   |
|                  |                      | Eidolon paramyxovirus RC09 partial L gene for RNA-dependent RNA polymerase, isolate EPMV_RC09_222k | HE647825.1        | 97.49                   |
|                  |                      | Eidolon helvum paramyxovirus clone U54A polymerase (L) gene, partial cds                           | JN862563.1        | 97.49                   |
|                  |                      | Eidolon helvum paramyxovirus clone U59B polymerase (L) gene, partial cds                           | JN862579.1        | 97.27                   |

|                  |   |                                                                          |            |       |
|------------------|---|--------------------------------------------------------------------------|------------|-------|
| <b>Z15-U115R</b> | 1 | Eidolon helvum paramyxovirus clone U58B polymerase (L) gene, partial cds | JN862583.1 | 76.26 |
|                  |   | Eidolon helvum paramyxovirus clone U32A polymerase (L) gene, partial cds | JN862594.1 | 75.8  |

**Table S2. Information of the virus sequences used for phylogenetic analyses downloaded from GenBank (NCBI).**

| Abbreviated as displayed on tree          | GenBank Accession | GenBank ID                                                                                                                           |
|-------------------------------------------|-------------------|--------------------------------------------------------------------------------------------------------------------------------------|
| <b>Measles virus</b>                      | AB016162.1        | Measles virus genomic RNA, complete sequence                                                                                         |
| <b>BatPV Eid hel ZFB09 07 Zambia</b>      | AB853094.1        | Bat Paramyxovirus Eid_hel/ZFB09-07/Zambia/2009 L gene for RNA polymerase, partial cds                                                |
| <b>Canine distemper virus</b>             | AF014953.1        | Canine distemper virus, complete genome                                                                                              |
| <b>Hendra virus</b>                       | AF017149.3        | Hendra virus, complete genome                                                                                                        |
| <b>Tupaia paramyxovirus</b>               | AF079780.2        | Tupaia paramyxovirus, complete genome                                                                                                |
| <b>Newcastle disease virus</b>            | AY845400.2        | Newcastle disease virus strain LaSota, complete genome                                                                               |
| <b>J-virus</b>                            | AY900001.1        | J-virus, complete genome                                                                                                             |
| <b>Nipah virus Bangladesh</b>             | AY988601.1        | Nipah virus from Bangladesh, complete genome                                                                                         |
| <b>BatPV GH27a Ghana</b>                  | FJ971940.1        | Paramyxovirus bat/GH27a/2009 polymerase (L) gene, partial cds                                                                        |
| <b>BatPV Eid hel GH45</b>                 | GQ168929.1        | Bat paramyxovirus Eid.hel/GH45/2008 polymerase (L) gene, partial cds                                                                 |
| <b>Tuhoko virus 1</b>                     | GU128080.1        | Tuhoko virus 1, complete genome                                                                                                      |
| <b>Tuhoko virus 2</b>                     | GU128081.1        | Tuhoko virus 2, complete genome                                                                                                      |
| <b>Tuhoko virus 3</b>                     | GU128082.1        | Tuhoko virus 3, complete genome                                                                                                      |
| <b>Eidolon PV isolate EPMV RC09 214s</b>  | HE647822.1        | Eidolon paramyxovirus RC09 partial L gene for RNA-dependent RNA polymerase, isolate EPMV_RC09_214s                                   |
| <b>Eidolon PV isolate EPMV_RC09_222kl</b> | HE647825.1        | Eidolon paramyxovirus RC09 partial L gene for RNA-dependent RNA polymerase, isolate EPMV_RC09_222k                                   |
| <b>Ghanaian bat henipavirus</b>           | HQ660129.1        | Bat Paramyxovirus Eid_hel/GH-M74a/GHA/2009, complete genom                                                                           |
| <b>BatPV Eid hel M61a Ghana</b>           | HQ660133.1        | Bat Paramyxovirus Eid_hel/GH-M61a/GHA/2009 isolate BatPV/Eid_hel/GH-M61a/GHA/2009 RNA-dependent RNA polymerase (L) gene, partial cds |
| <b>BatPV Eid hel GB1535 Gabon</b>         | HQ660141.1        | Bat Paramyxovirus Eid_hel/GB1535/GAB/2005 isolate BatPV/Eid_hel/GB1535/GAB/2005 RNA-dependent RNA polymerase (L) gene, partial cds   |
| <b>BatPV Eid hel GB1678 Gabon</b>         | HQ660144.1        | Bat Paramyxovirus Eid_hel/GB1678/GAB/2005 isolate BatPV/Eid_hel/GB1678/GAB/2005 RNA-dependent RNA polymerase (L) gene, partial cds   |
| <b>BatPV Eid hel clone U44A</b>           | JN648059.1        | Eidolon helvum paramyxovirus clone U44A large protein (L) gene, partial cds                                                          |
| <b>BatPV Eid hel clone U49B</b>           | JN648067.1        | Eidolon helvum paramyxovirus clone U49B large protein (L) gene, partial cds                                                          |
| <b>BatPV Eid hel clone U64A</b>           | JN648077.1        | Eidolon helvum paramyxovirus clone U64A large protein (L) gene, partial cds                                                          |
| <b>BatPV Eid hel clone U66A</b>           | JN648078.1        | Eidolon helvum paramyxovirus clone U66A large protein (L) gene, partial cds                                                          |

|                                    |             |                                                                             |
|------------------------------------|-------------|-----------------------------------------------------------------------------|
| <b>BatPV Eid hel clone U68G</b>    | JN648082.1  | Eidolon helvum paramyxovirus clone U68G large protein (L) gene, partial cds |
| <b>BatPV Eid hel clone U69C</b>    | JN648083.1  | Eidolon helvum paramyxovirus clone U69C large protein (L) gene, partial cds |
| <b>BatPV Eid hel clone U69D</b>    | JN648084.1  | Eidolon helvum paramyxovirus clone U69D large protein (L) gene, partial cds |
| <b>BatPV Eid hel clone U6B</b>     | JN648086.1  | Eidolon helvum paramyxovirus clone U6B large protein (L) gene, partial cds  |
| <b>BatPV Eid hel clone U9D</b>     | JN648089.1  | Eidolon helvum paramyxovirus clone U9D large protein (L) gene, partial cds  |
| <b>BatPV Eid hel clone U6B</b>     | JN862562.1  | Eidolon helvum paramyxovirus clone U6B polymerase (L) gene, partial cds     |
| <b>Bat PV Eid hel clone U54A</b>   | JN862563.1  | Eidolon helvum paramyxovirus clone U54A polymerase (L) gene, partial cds    |
| <b>Bat PV Eid hel clone U51A</b>   | JN862564.1  | Eidolon helvum paramyxovirus clone U51A polymerase (L) gene, partial cds    |
| <b>BatPV Eid hel clone U62A</b>    | JN862567.1  | Eidolon helvum paramyxovirus clone U62A polymerase (L) gene, partial cds    |
| <b>BatPV Eid hel clone U59A</b>    | JN862570.1  | Eidolon helvum paramyxovirus clone U59A polymerase (L) gene, partial cds    |
| <b>Bat PV Eid hel clone U54B</b>   | JN862571.1  | Eidolon helvum paramyxovirus clone U54B polymerase (L) gene, partial cds    |
| <b>Bat PV Eid hel clone U51B</b>   | JN862573.1  | Eidolon helvum paramyxovirus clone U51B polymerase (L) gene, partial cds    |
| <b>Bat PV Eid hel clone U63A</b>   | JN862574.1  | Eidolon helvum paramyxovirus clone U63A polymerase (L) gene, partial cds    |
| <b>Bat PV Eid hel clone U64A</b>   | JN862575.1  | Eidolon helvum paramyxovirus clone U64A polymerase (L) gene, partial cds    |
| <b>BatPV Eid hel clone U42B</b>    | JN862577.1  | Eidolon helvum paramyxovirus clone U42B polymerase (L) gene, partial cds    |
| <b>Bat PV Eid hel clone U61A</b>   | JN862578.1  | Eidolon helvum paramyxovirus clone U61A polymerase (L) gene, partial cds    |
| <b>Bat PV Eid hel clone U59B</b>   | JN862579.1  | Eidolon helvum paramyxovirus clone U59B polymerase (L) gene, partial cds    |
| <b>Bat PV Eid hel clone U50B</b>   | JN862580.1  | Eidolon helvum paramyxovirus clone U50B polymerase (L) gene, partial cds    |
| <b>Bat PV Eid hel clone U58B</b>   | JN862583.1  | Eidolon helvum paramyxovirus clone U58B polymerase (L) gene, partial cds    |
| <b>BatPV Eid hel clone U68B</b>    | JN862590.1  | Eidolon helvum paramyxovirus clone U68B polymerase (L) gene, partial cds    |
| <b>Bat PV Eid hel clone U32A</b>   | JN862594.1  | Eidolon helvum paramyxovirus clone U32A polymerase (L) gene, partial cds    |
| <b>Achimota pararubulavirus 1</b>  | JX051319.1  | Achimota virus 1, complete genome                                           |
| <b>Mojiang virus</b>               | KF278639.1  | Mojiang virus isolate Tongguan1, complete genome                            |
| <b>Hendra virus Horse</b>          | MN062017.1  | Hendra henipavirus strain HeV/Australia/1994/Horse18, complete genome       |
| <b>Achimota pararubulavirus 3</b>  | MT062420.1  | Achimota pararubulavirus 3 isolate U72, complete genome                     |
| <b>Sendai virus</b>                | NC_001552.1 | Sendai virus genomic RNA, antisense, complete sequence                      |
| <b>Human parainfluenza virus 3</b> | NC_001796.2 | Human parainfluenza virus 3, complete genome                                |

|                                         |             |                                                                        |
|-----------------------------------------|-------------|------------------------------------------------------------------------|
| <b>Mumps virus</b>                      | NC_002200.1 | Mumps virus, complete genome                                           |
| <b>Nipah virus Malaysia</b>             | NC_002728.1 | Nipah virus, complete genome                                           |
| <b>Human rubulavirus 2</b>              | NC_003443.1 | Human rubulavirus 2, complete genome                                   |
| <b>Human parainfluenza virus 1</b>      | NC_003461.1 | Human parainfluenza virus 1, complete genome                           |
| <b>Tioman virus</b>                     | NC_004074.1 | Tioman virus, complete genome                                          |
| <b>Mossman virus</b>                    | NC_005339.1 | Mossman virus, complete genome                                         |
| <b>Rinderpest virus</b>                 | NC_006296.2 | Rinderpest virus (strain Kabete O), complete genome                    |
| <b>Peste des petits ruminants virus</b> | NC_006383.2 | Peste des petits ruminants virus complete genome                       |
| <b>Simian virus 41</b>                  | NC_006428.1 | Simian virus 41, complete genome                                       |
| <b>Parainfluenza virus 5</b>            | NC_006430.1 | Parainfluenza virus 5, complete genome                                 |
| <b>Beilong virus</b>                    | NC_007803.1 | Beilong virus, complete genome                                         |
| <b>Mapuera virus</b>                    | NC_009489.1 | Mapuera virus, complete genome                                         |
| <b>Porcine rubulavirus</b>              | NC_009640.1 | Porcine rubulavirus, complete genome                                   |
| <b>Nariva virus</b>                     | NC_017937.1 | Nariva virus, complete genome                                          |
| <b>Human parainfluenza virus 4</b>      | NC_021928.1 | Human parainfluenza virus 4a viral cRNA, complete genome, strain: M-25 |
| <b>Sosuga virus</b>                     | NC_025343.1 | Sosuga virus isolate 2012, complete genome                             |
| <b>Cedar virus</b>                      | NC_025351.1 | Cedar virus isolate CG1a, complete genome                              |
| <b>Achimota pararubulavirus 2</b>       | NC_025404.1 | Achimota virus 2, complete genome                                      |
| <b>Bat mumps orthorubulavirus</b>       | NC_038271.1 | Bat Paramyxovirus Epo_spe/AR1/DRC/2009, complete genome                |
| <b>Menangle virus</b>                   | NC_039197.1 | Menangle virus isolate Australia/bat/2009/Cedar Grove, complete genome |

**Table S3. Nucleotide sequences detected using PCR.**

Abbreviations: P = 530 bp fragment obtained with the pan-*Paramyxovirinae* RT-PCR, R = 439 bp fragment obtained with the *Respiro-Morbilli-Henipavirus* RT-PCR

| <b>Sequence Name</b> | <b>Genbank ID: description</b>              | <b>Nucleotide Sequence</b>                                                                                                                                                                                                                                                                                                                                                                                                                                                                     |
|----------------------|---------------------------------------------|------------------------------------------------------------------------------------------------------------------------------------------------------------------------------------------------------------------------------------------------------------------------------------------------------------------------------------------------------------------------------------------------------------------------------------------------------------------------------------------------|
| <b>Z15-U12R</b>      | MZ393364<br>RMH Bat Eid<br>hel/GH/2015/U12R | ATATCGAGACAGACATGGTGGAAATTTGGCCAGAATGTTATCTCCCAACCAC-<br>GCTTCTCAAATAATTAAGAGTAAAAAGATGAATGGGGAAGGGTTATCTATAGAG-<br>GATTGTGTCGAAAACCTGGCGATCATTTTGTGGAT-<br>TTAAATTCGGGTGTTTTATGTCTTTAACTTTAGATGAGGATCTGAGCATGTACATGAAAGA-<br>CAAAGCTTTGTCTCCCATTAATCACAATGG-<br>GACTCTGTTTACCCTAATGCCAACATGAAATACACGCCAAAGCCTAGTACTA-<br>CATCCAGAAGATTGGTAGACGTATTTATCAATGATGCTGAGTTTGAACCGTCAAATTTAA-<br>TAAACTATGTAATCAACGGTGACTATTTGGTGGATGAAGAT-<br>TTCAACATTTCTTATAGTCTAAAAGAAAAAGAGTCAAAGAAGTTGGGAGACTG |
| <b>Z15-U17R</b>      | MZ393365<br>RMH Bat Eid<br>hel/GH/2015/U17R | TTATAGAGACAGGCATGGAGGTGCCTGGCCTCCCGTCAAGTTTCCAGAGCAC-<br>TGCTCAAAAA-<br>GCATACTGAGACTCAAAAATTCTGGCGAATCTATTACTATAGAAGATTGTGTTAAAACTG<br>GGAATCATTTTGCGGCATTGAATTCGGTTGTTTTATGGACTTAAACCTGGACAC-<br>TGATCTAA-<br>GCATGTATATGAAAGATAAGGCTTTGTACCTATCAAAGAAGAATGGGATAGTGTATACC<br>CTAAAGAGGTATTGTCATATAAACCTCCCAAATTAACAGAGCCCAGAAGACTAG-<br>TAGATGTATTTGTCAATGACCCAGATTTTGATCCTTATGAAATGATTCAGTATGTCTTGACA                                                                                       |

|                  |                                              |                                                                                                                                                                                                                                                                                                                                                                                                                                                                                                                                                                                                 |
|------------------|----------------------------------------------|-------------------------------------------------------------------------------------------------------------------------------------------------------------------------------------------------------------------------------------------------------------------------------------------------------------------------------------------------------------------------------------------------------------------------------------------------------------------------------------------------------------------------------------------------------------------------------------------------|
|                  |                                              | GGAGCATACCTAACAGACCCGAAGTTCAATGTCTCGTATAGTTTGAAAGAGAAA-GAAACTAAGCAAGCAGGGAGATTA                                                                                                                                                                                                                                                                                                                                                                                                                                                                                                                 |
| <b>Z15-U27R</b>  | MZ393366<br>RMH Bat Eid<br>hel/GH/2015/U27R  | TTTtagagatcaacatggaggtgcttggcctccggtagttttac-<br>CAAATCATGCAGACCCTAGGATAAAAAAGACTTAAAAACAATGATGAAGCAATCTC-<br>TATTGAGGATGCCATTAAATACTGGAAATCATTGTAGGGTTCCACTTTAAGA-<br>CATTATGCCTTTAAACTTGGACAAAGATTAAAGTATGTATATGAAAGA-<br>CAAGGCTTTATCACCAATCAAATCAGAGTGGGATTCTGTATACCCAAAAGATAA-<br>TATGCTTTATGTTCTCCGAAAAATACAACATCAAGAAGATTAGTTGATGTATTCCTT-<br>GATGATTCCGATTTTGATCCTATGAATTTGATCAATTATGTTATATCTGGTGATTATT-<br>GAAAGATCCTGATTTCAACATATCTTATAGTTTAAAGGAAAAAGAGACAAAACAAGTT-<br>GGTCGGTTA                                                                                                    |
| <b>Z15-U78R</b>  | MZ393367<br>RMH Bat Eid<br>hel/GH/2015/U78R  | GTATAGAGATAGACATGGAGGTACTTGGCCACCCTGTAATCTTCTCCCCATTGTTAC-<br>CTGCCATTGCAAAAAACAACATAATGCAGAATCAGTGCAATAGAGGACTG-<br>TATTCAAAATTGGCAATCATTTTGTGGGTTCAGTTTCAAGTGTTTTATGCCATTATCATT-<br>AGATTCAGATCTTAGTATGTACATGAAGGACAAAGCATTATCACCTAA-<br>TAAATCAGAATGGGACTCTGTCTATCCCGCAACAAACACCAAATACACACCACCTA-<br>GATCTCAAACATCTAGGAGATTAGTTGATAGGTTCAATGAAGATGATGAGTTTGAAC-<br>CATCTGACATGATCAATTATGTCCTTTCAGGTGAGTATCTCAGTGATGATACATTAA-<br>TATCTCATACAGTCTAAAAGAGAAAAGAAGTCAAAGAAGTCGGACGATTA                                                                                                          |
| <b>Z15-U86R</b>  | MZ393368<br>RMH Bat Eid<br>hel/GH/2015/U86R  | CTATCGAGATCAACATGGAGGTGCCTGGCCTCCTGTTCACTTCAAGGACCATATAA-<br>GCAAAAAGATCAAGAGGTTAATGATTAATAATGAGGCAATATCTGTAGAAGATGCAG-<br>TTCTGAACTGGAAATCCTTTATAGGTTTCAAATTTGGTATATTTATGCCACTTGATCTGGA-<br>TAGTGATTTGAGCATGTATATGAAAGATAAAGGCATTATCTCCATTGAACAAAGATTGG-<br>GATTCCGTTTATCCTAAGGAAAATTTGAAATACACACCCCCGAAAAGCCAAGTCTCAA-<br>GACGTCTCGTGGATGTATTTTGAAGATGAACAATTTGACCCTGTCAATTTGATTAAAC-<br>TATGTTCTTAGTGGAGAATACTTACAAGACAAGAATTTCAACATCTCTTATAGTTTAAAA-<br>GAAAAGGAGACAAAACAAGCTGGTCGACTA                                                                                                      |
| <b>Z15-U115R</b> | MZ393369<br>RMH Bat Eid<br>hel/GH/2015/U115R | ATTCCGAGATCAACATGGAGGTGCTTGGCCCCCTATCACATTCCCAGAGCATGTTGA-<br>TAAACATATTAAGACTACAAATCAATAGCGAAGCAATATCTGTAGAAGATGCTATACT-<br>AAATTGGAGATCTTTTGTGGGTGCCATTTCAAGCAATTTATGCCTCTCGATTTAGA-<br>TAAGGATCTTAGTATGTACATGAAAGATAAAGCATTATCCCCAATTAAGGAATGG-<br>GATTCAGTATATCCTAGGGACAGTATGTATTATTGTCCTCCCAATCAACGACTTCAC-<br>GCAGATTGGTTGAGGTATTCTTAGAAGATTCTGAATTCGATCCAGCAGAACTAATGGAG-<br>TATGTATTGTCTGGCGATTATCTTAATGACCAAGATTTTAATATAAGTTACAGTCTCAA-<br>GAGAAAGAAACAAAACAAGTGGGTAGACTT                                                                                                              |
| <b>Z15-U17P</b>  | MZ393370<br>PAR Bat Eid<br>hel/GH/2015/U17P  | TGAATCAATAGCGATCACACAGAAAGTTCATCCAAATTTAC-<br>CATACAGGGTCAAAAAGGAAATATGTGCAAAGCAAGCACAAATATATTTCAAGAGAT-<br>TAAGGGAAAATTTAAGATCATTAGGCCATGATCTCAAGGCAACTGAAACAATTATCAG-<br>CACACACCTCTTTGTATACTCCAAGAAAAATACATTATGATGGGGCAGTACTTTCCCAA-<br>GCACTTAAATCCATATCTAGGTGTTGTTTCTGGTCAGAGACATTAGTG-<br>GATGAAACTAGGTCAGCATGCAGTAATATCAGCACTGCTATAGCTAAAAGCATAGA-<br>GAATGGTCTATCTAAAGATGTAGGCTACTGCTT-<br>GAACTTTTTAAAAGTTTTACAACAATTACTGATTGCGACTGAATTCGGAATTAATGATAC-<br>GTTGACACCAGACGTTACCAGGCCGATAACTGAAAACCCGGAGTGGTTAATTACAGCGG-<br>CATTAATCCCAGCACCAATTGGAGGATACAACATTTGAATATGTCTAGAATATACGTTA |
| <b>Z15-U27P</b>  | MZ393371<br>PAR Bat Eid<br>hel/GH/2015/U27P  | CCAATCAATAGCAATCACAAGGAGAGTTCATCCCTCATTAAAGTTTCAAAGCCAAAAAAGA-<br>TATTGCTGCAGATACAACACAAAAATACTTCTTAAGACTTCGGGAGAATCTAAGAGCTTTA<br>GGTCATGATCTTAAAGCAAACGAAACAATTATGAGCACAGCATTTTTTGTATATTCAA-<br>GAA-<br>GATATATTATGATGGACTTGATTGTACAGGCACTTAAATCTATTGCAAGATGTTGCTTTT<br>GGTCTGAAACACTAGTGGATGAATCACGATCAGCATGTTCAAACATATCAACTACCATT-<br>GCCAATCTATTGAAAACGGATTATCGAAGAAAGCAGGTTACTGCCTTAATCTACTAAAAA                                                                                                                                                                                          |

|                  |                                              |                                                                                                                                                                                                                                                                                                                                                                                                                                                                                                                                                                                                    |
|------------------|----------------------------------------------|----------------------------------------------------------------------------------------------------------------------------------------------------------------------------------------------------------------------------------------------------------------------------------------------------------------------------------------------------------------------------------------------------------------------------------------------------------------------------------------------------------------------------------------------------------------------------------------------------|
|                  |                                              | CTCTTCAACAATTATACATTACCCTGGGATTCAATATTAATGAGACATTAACAGAG-<br>GATGTGACTAAATCTATGATCCAAAATTATAGCTGGTTGATATCAGCTTCATTACTTCCAGC<br>TCCTTTAGGAGGATTCAATTATCTTAATATGTCCCGTGTGTTTGTA                                                                                                                                                                                                                                                                                                                                                                                                                      |
| <b>Z15-U111P</b> | MZ393372<br>PAR Bat Eid<br>hel/GH/2015/U111P | TCAAGCTATCGCAATTACTGCAAAGGTGCCTCGTGCAGCTCCGTACCAAGAGAAGAAGA-<br>GAATAGCATTTGAGAATAGCAAATTGTTCAATTGAGCGTCTTAGAGCAAATAA-<br>TAAAGGATTAGGACATCATCTCAAAGAGCAAGAGACAATTTGAGTTCGAGTTCTTT-<br>GTTTACAGCAAGCGCATCTTTTTTCGCGGAAGGAT-<br>TTTAAATCAGGCATTAATAAATGTTAGCAAATAAACCTAATT-<br>GCAGATGTTCTAAGTGAATGCAGTCAGACTTCATGTGCTAATTTGACCACAACAG-<br>TGATGAGACTCACAGAAAATGGGGTCGAGAAAGATATTTGTTACTTCCTCAG-<br>TATTTATCTCTCTATTAAGCAATTGGTCTATGATCTGATGTTCCCGATGACTACATTCATT-<br>GAAGATGCTATTACTTCTTTATATCTCAACCACCCTATCTTGATTGCTAGAC-<br>TATGTGTGTTACCTTCACAGCTTGGCGGGCTCAATAATTACTCAATCAGCAGAT-<br>TATTTAACA |
